# Supplementary material
Source: PubMed Central journal article supplement (PMC3553733)
Supplement: AAC.01003-12_zac999101571so1.pdf [file AAC.01003-12_zac999101571so1.pdf]

**A** *in vivo* bioluminescence (log scale)

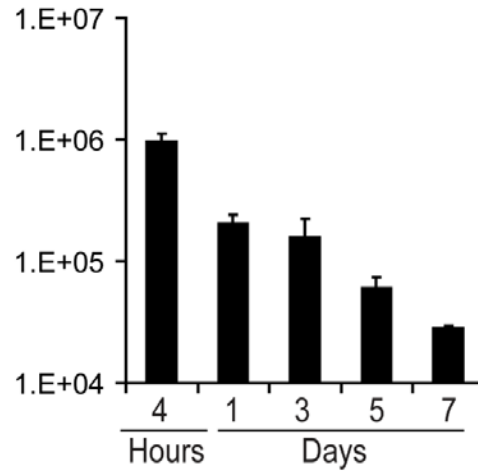

**B** Total MRSA CFUs harvested from the infected skin (log scale)

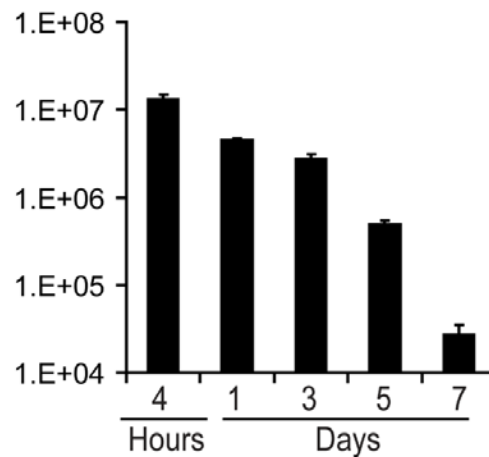

**Figure S1. *In vivo* bioluminescent signals of CA-MRSA-infected wounds and *ex vivo***

**bacterial CFU counts.** Scalpel wounds on the backs of mice were inoculated with USA300

LAC::*lux* ( $2 \times 10^6$  CFU/10  $\mu$ l). (A) Bacterial counts as measured by *in vivo* bioluminescent signals

(mean total flux [photons/s]  $\pm$  sem) (logarithmic scale) from mice (n=6 mice per group) imaged

at 4-h and on days 1, 3, 5 and 7. (B) Mean CFU  $\pm$  SEM (logarithmic scale) recovered from 8-mm

lesional punch biopsies from euthanized mice (n=6 mice per group) performed at 4-h and on

days 1, 3, 5 and 7.
